# Supplementary material for: Mitochondrial respiration during normothermic liver machine perfusion predicts clinical outcome
Source: PubMed Central journal article supplement (PMC9626552; doi:10.1016/j.ebiom.2022.104311), 2022-10-29
Supplement: mmc1.pdf [file mmc1.pdf]

## Supplementary material

### Table of contents:

|                                                                                |          |
|--------------------------------------------------------------------------------|----------|
| <b>Table S 1: SUI01 protocol</b> .....                                         | <b>1</b> |
| <b>Table S 2: SUI02 protocol</b> .....                                         | <b>1</b> |
| <b>Table S 3: Reasons for discard of the non-transplanted livers</b> .....     | <b>2</b> |
| <b>Figure S 1: Machine perfusion parameters during NMP</b> .....               | <b>2</b> |
| <b>Table S 4: Histological assessment</b> .....                                | <b>3</b> |
| <b>Table S 5: Immunohistochemistry</b> .....                                   | <b>3</b> |
| <b>Figure S 2: Immunohistochemistry of transplanted livers</b> .....           | <b>4</b> |
| <b>Figure S 3: Immunohistochemistry of discarded livers</b> .....              | <b>5</b> |
| <b>Figure S 4: Perfusate analysis of IL-6 and TNF<math>\alpha</math></b> ..... | <b>6</b> |
| <b>Figure S 5: Analysis of adenine nucleotides</b> .....                       | <b>6</b> |
| <b>Table S 6: ANOVA Table (Type II tests)</b> .....                            | <b>7</b> |
| <b>Table S 7: ANOVA Table (Type II tests) – MEAF</b> .....                     | <b>7</b> |
| <b>Table S 8: ANOVA Table (Type II tests) – EAD</b> .....                      | <b>7</b> |

**Table S 1: SUI01 protocol**

| Step | Compound                             | Concentration                  | Coupling control state          | ET-pathway state | Function                                 |
|------|--------------------------------------|--------------------------------|---------------------------------|------------------|------------------------------------------|
| 1    | Tissue homogenate (2 mL)             | 1 mg wet mass·mL <sup>-1</sup> |                                 | ROX              |                                          |
| 2    | ADP-Mg <sup>2+</sup> (Merck, 117105) | 5 mM                           |                                 | ROX              | Substrate of ATP synthase                |
| 3    | Malate (Sigma, M1000)                | 0.1 mM                         |                                 |                  | NADH-linked substrate                    |
| 4    | Octanoylcarnitine (APExBIO, B6371)   | 0.5 mM                         | OXPPOS ( <i>P</i> )             | FAO              | Substrate for fatty acid oxidation (FAO) |
| 5    | Cytochrome <i>c</i> (Sigma, C7752)   | 10 $\mu$ M                     | OXPPOS ( <i>P<sub>c</sub></i> ) | FAO              | Evaluate outer mt-membrane integrity     |
| 6    | Pyruvate (Sigma, P2256)              | 5 mM                           | OXPPOS ( <i>P<sub>c</sub></i> ) | FAO+NADH         | Feeds TCA (via Acetyl-CoA)               |
| 7    | Malate (Sigma, M1000)                | 2 mM                           | OXPPOS ( <i>P<sub>c</sub></i> ) | FAO+NADH         | NADH-linked substrate                    |
| 8    | Glutamate (Sigma, G1626)             | 10 mM                          | OXPPOS ( <i>P<sub>c</sub></i> ) | FAO+NADH         | NADH-linked substrate                    |
| 9    | Succinate (Sigma, S2378)             | 10 mM                          | OXPPOS ( <i>P<sub>c</sub></i> ) | FAO+NADH+S       | Substrate of Complex II                  |
| 10   | Rotenone (Sigma, R8875)              | 0.5 $\mu$ M                    | OXPPOS ( <i>P<sub>c</sub></i> ) | S                | Inhibition of Complex I                  |
| 11   | Antimycin A (Sigma, A8674)           | 2.5 $\mu$ M                    |                                 | ROX              | Inhibition of Complex III                |

**Table S 2: SUI02 protocol**

| Step | Chemical                             | Concentration                  | Coupling control state          | Function                                |
|------|--------------------------------------|--------------------------------|---------------------------------|-----------------------------------------|
| 1    | Tissue homogenate (2 mL)             | 1 mg wet mass·mL <sup>-1</sup> |                                 |                                         |
| 2    | Rotenone (Sigma, R8875)              | 0.5 $\mu$ M                    |                                 | Inhibition of Complex I                 |
| 3    | Succinate (Sigma, S2378)             | 10 mM                          | LEAK ( <i>L</i> )               | Substrate of Complex II                 |
| 4    | ADP Mg <sup>2+</sup> (Merck, 117105) | 5 mM                           | OXPPOS ( <i>P</i> )             | Substrate of ATP synthase               |
| 5    | Cytochrome <i>c</i> (Sigma, C7752)   | 10 $\mu$ M                     | OXPPOS ( <i>P<sub>c</sub></i> ) | Evaluate outer mt-membrane integrity    |
| 6    | CCCP (Sigma, C2759)                  | 0.5 $\mu$ M per step           | ET ( <i>E</i> )                 | Uncoupling of mitochondrial respiration |
| 7    | Antimycin A (Sigma, A8674)           | 2.5 $\mu$ M                    |                                 | Inhibition of Complex III               |

**Table S 3: Reasons for discard of the non-transplanted livers**

| Liver # | Reason for discard                                                                                                                              |
|---------|-------------------------------------------------------------------------------------------------------------------------------------------------|
| 1       | Inadequate lactate clearance, high perfusate transaminases                                                                                      |
| 2       | Inadequate lactate clearance, high perfusate transaminases                                                                                      |
| 3       | Inadequate lactate clearance, high perfusate IL-6 levels                                                                                        |
| 4       | High perfusate transaminases                                                                                                                    |
| 5       | Inadequate lactate clearance                                                                                                                    |
| 6       | Technical problems related to NMP                                                                                                               |
| 7       | Malignant tumor of the donor                                                                                                                    |
| 8       | Histology: fibrosis and steatosis; prolonged cold ischemia time                                                                                 |
| 9       | Histology: fibrosis                                                                                                                             |
| 10      | High DRI; Histology: fibrosis; high perfusate transaminases                                                                                     |
| 11      | High risk organ (DCD); high perfusate transaminases                                                                                             |
| 12      | Histology: macrosteatosis, physiological perfusate pH could not be maintained despite NaHCO <sub>3</sub> addition, inadequate lactate clearance |
| 13      | Histology: fibrosis and steatosis                                                                                                               |
| 14      | Histology: fibrosis and steatosis                                                                                                               |
| 15      | Arteriosclerosis A. hepatica, inadequate lactate clearance                                                                                      |

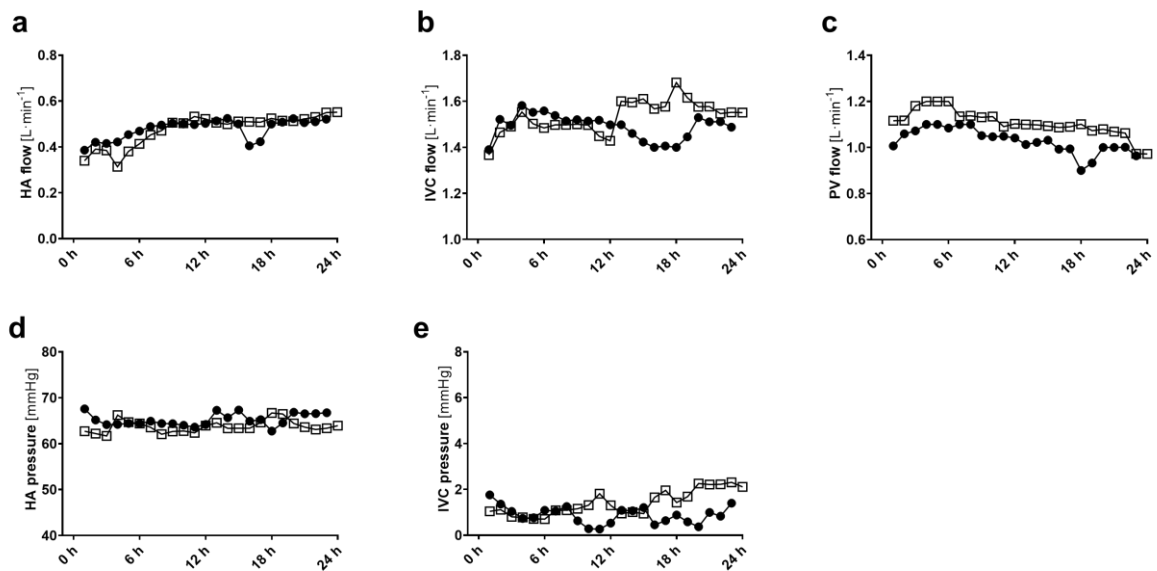

**Figure S 1: Machine perfusion parameters during NMP. (a) Hepatic artery flow, (b) inferior vena cava flow, (c) portal vein flow, (d) hepatic artery pressure and (e) inferior vena cava pressure for livers transplanted (solid circles) and not transplanted (open boxes), expressed as median.**

**Table S 4: Semiquantitative assessment of histological changes during normothermic machine perfusion**

| <b>Transplanted</b>                    | <b>pre</b> | <b>1 h</b>   | <b>6 – 9 h</b> | <b>9 – 15 h</b> | <b>15 – 24 h</b> | <b>post</b> |
|----------------------------------------|------------|--------------|----------------|-----------------|------------------|-------------|
| <b>Necrosis [median (IQR)]</b>         | 0 (0 – 0)  | 0 (0 – 1)    | 0 (0 – 1)      | 0 (0 – 1)       | 0 (0 – 1)        | 0 (0 – 1)   |
| <b>Steatosis [median (IQR)]</b>        | 0 (0 – 1)  | 0 (0 – 1)    | 0 (0 – 1)      | 0 (0 – 1)       | 0 (0 – 0.75)     | 0 (0 – 1)   |
| <b>Fibrosis [median (IQR)]</b>         | 0 (0 – 0)  | 0 (0 – 0)    | 0 (0 – 0)      | 0 (0 – 0)       | 0 (0 – 0)        | 0 (0 – 0)   |
| <b>Inflammation [median (IQR)]</b>     | 1 (1 – 1)  | 1 (1 – 1)    | 1 (1 – 1)      | 1 (1 – 1)       | 1 (1 – 1)        | 1 (1 – 1)   |
| <b>Vascular changes [median (IQR)]</b> | 1 (0 – 1)  | 1 (0.75 – 1) | 1 (1 – 1)      | 1 (1 – 1)       | 1 (1 – 1)        | 1 (1 – 1)   |

  

| <b>Discarded</b>                       | <b>pre</b>  | <b>1 h</b>  | <b>6 – 9 h</b> | <b>9 – 15 h</b> | <b>15 – 24 h</b> |
|----------------------------------------|-------------|-------------|----------------|-----------------|------------------|
| <b>Necrosis [median (IQR)]</b>         | 0 (0 – 0)   | 0 (0 – 1)   | 1 (0 – 1)      | 1.5 (1 – 3)     | 1.5 (0.75 – 3)   |
| <b>Steatosis [median (IQR)]</b>        | 0.5 (0 – 1) | 1 (0 – 1)   | 0.5 (0 – 1)    | 0.5 (0 – 1)     | 0.5 (0 – 1)      |
| <b>Fibrosis [median (IQR)]</b>         | 0 (0 – 0)   | 0 (0 – 0)   | 0 (0 – 0)      | 0 (0 – 0.75)    | 0 (0 – 0.25)     |
| <b>Inflammation [median (IQR)]</b>     | 1 (0 – 1)   | 1 (0.5 – 1) | 1 (0 – 1)      | 1 (0.25 – 1)    | 1 (0 – 1)        |
| <b>Vascular changes [median (IQR)]</b> | 1 (0 – 1)   | 1 (0.5 – 1) | 1 (0.25 – 1)   | 1 (1 – 1)       | 1 (1 – 1)        |

**Table S 5: Semiquantitative assessment of immunohistochemistry during normothermic machine perfusion**

|                              | <b>Transplanted</b>    |                       |                        | <b>Discarded</b>        |                         |                         |
|------------------------------|------------------------|-----------------------|------------------------|-------------------------|-------------------------|-------------------------|
|                              | <b>pre</b>             | <b>6 – 9 h</b>        | <b>end</b>             | <b>pre</b>              | <b>6 – 9 h</b>          | <b>end</b>              |
| <b>CD3 [median (IQR)]</b>    | 37.50 (15.00 – 127.50) | 37.50 (14.25 – 75.00) | 37.50 (14.25 – 127.50) | 150.00 (52.50 – 232.50) | 150.00 (45.00 – 225.00) | 150.00 (45.00 – 225.00) |
| <b>CD20 [median (IQR)]</b>   | 7.50 (3.00 – 19.50)    | 4.50 (2.25 – 22.50)   | 4.50 (2.25 – 19.50)    | 15.00 (7.50 – 105.00)   | 60.00 (3.00 – 120.00)   | 60.00 (1.50 – 120.00)   |
| <b>CD68 [median (IQR)]</b>   | 15.00 (3.00 – 30.00)   | 15.00 (3.00 – 18.75)  | 15.00 (3.00 – 30.00)   | 30.00 (42.50 – 22.50)   | 30.00 (22.50 – 42.50)   | 30.00 (22.50 – 65.00)   |
| <b>TLR4 [median (IQR)]</b>   | 8.00 (0.00 – 40.00)    | 18.00 (0.00 – 40.00)  | 10.50 (0.00 – 31.50)   | 3.00 (0.00 – 15.00)     | 3.00 (0.00 – 15.00)     | 3.00 (0.00 – 15.00)     |
| <b>CCasp3 [median (IQR)]</b> | 0.00 (0.00 – 11.25)    | 0.00 (0.00 – 7.50)    | 0.00 (0.00 – 22.50)    | 0.00 (0.00 – 32.00)     | 4.00 (0.00 – 12.50)     | 4.00 (2.00 – 10.00)     |

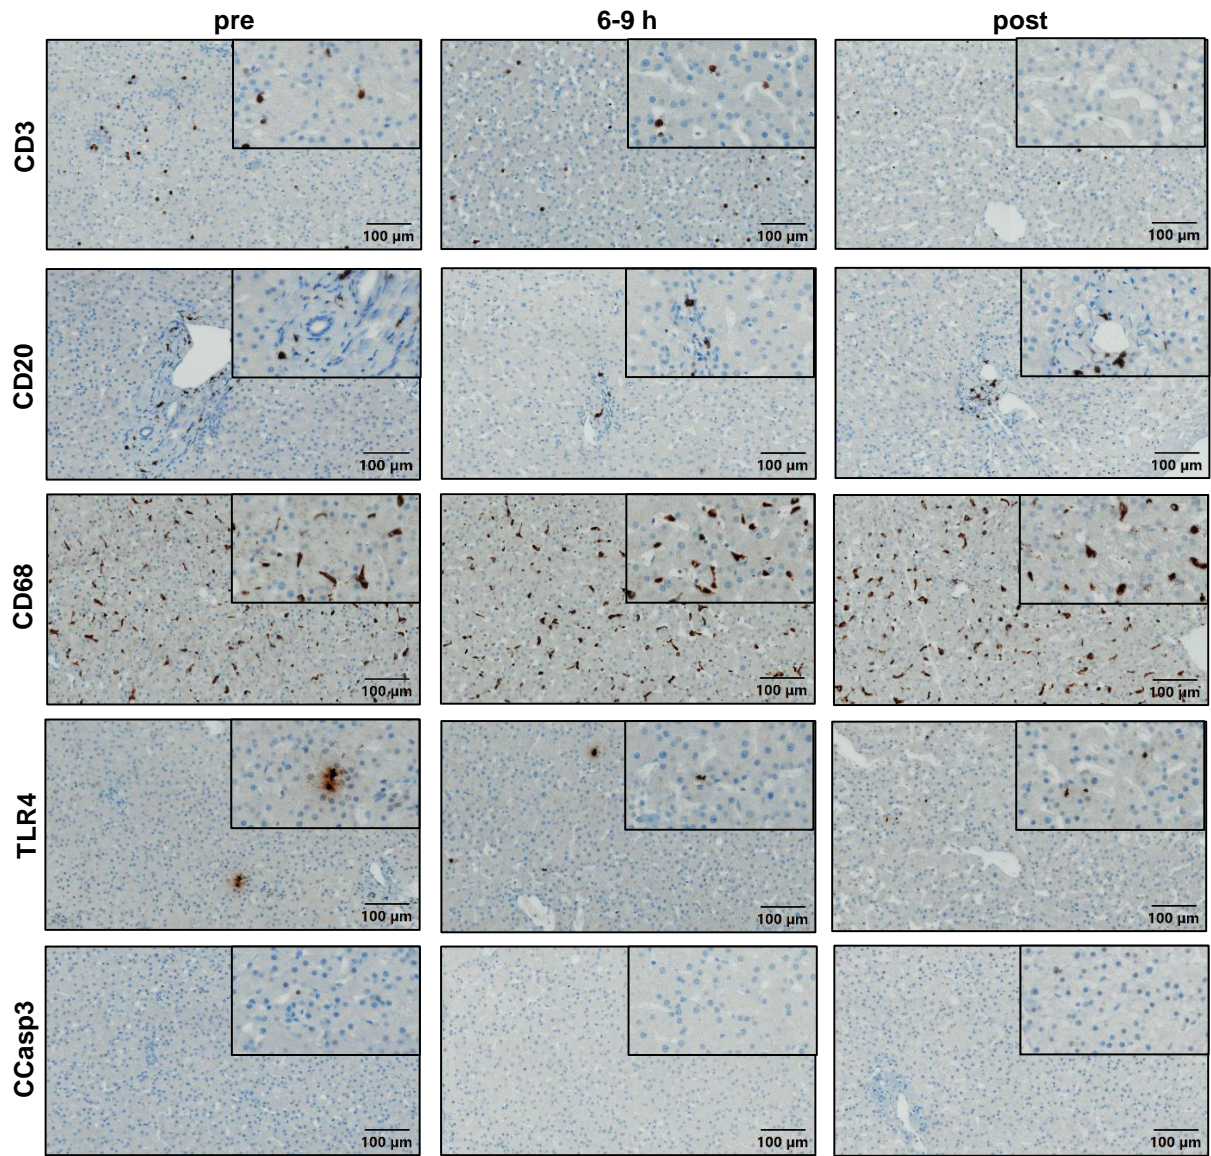

**Figure S 2: Immunohistochemistry of livers with subsequent transplantation after NMP. Representative images of CD3, CD20, CD68, TLR4 and CCasp3 stainings in the course of NMP.**

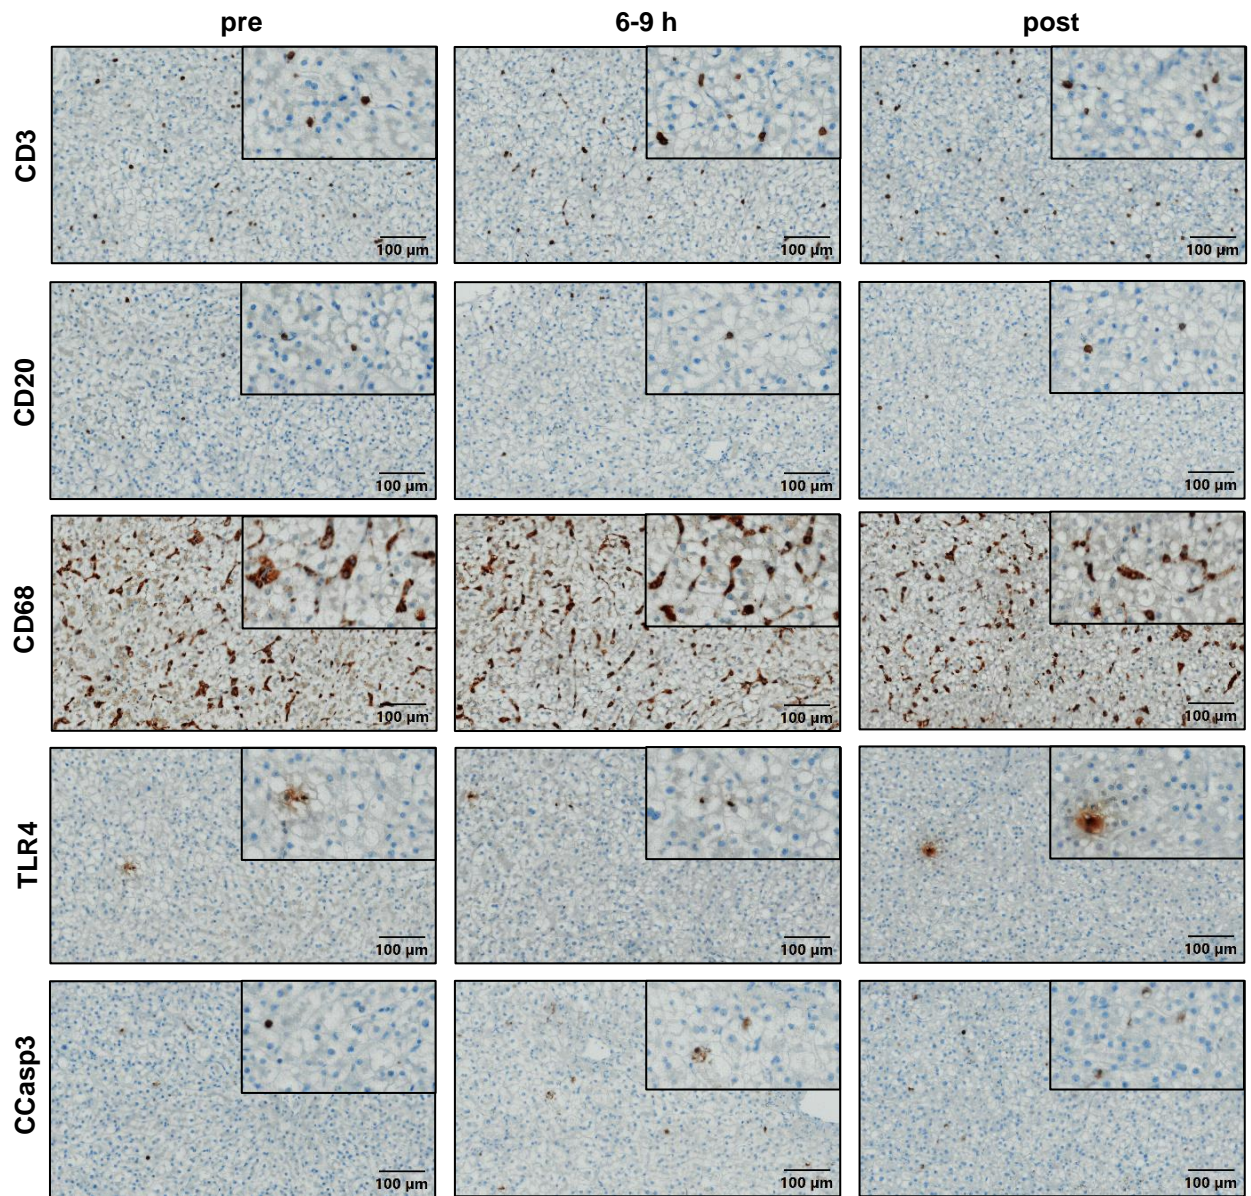

*Figure S 3: Immunohistochemistry of livers discarded after NMP. Representative images of CD3, CD20, CD68, TLR4 and CCasp3 stainings in the course of NMP.*

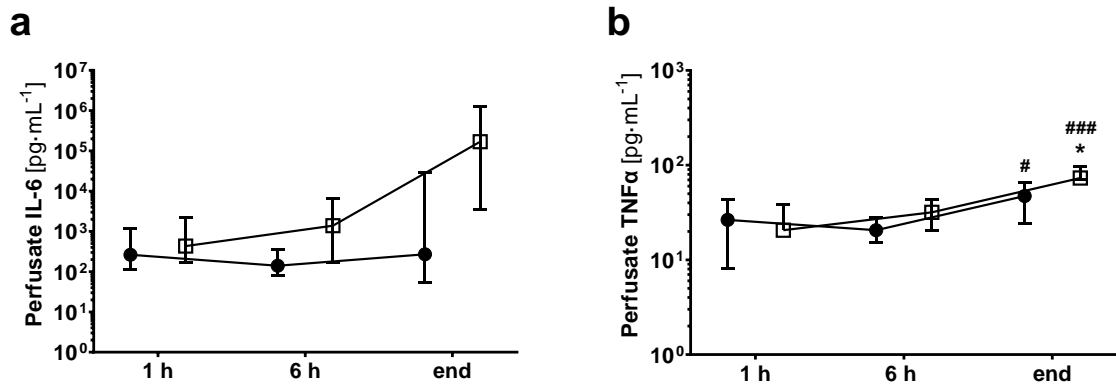

Figure S 4: Perfusate analysis during normothermic machine perfusion. (a) Interleukin-6 and (b) tumor necrosis factor alpha levels for transplanted (solid circles) and not transplanted (open boxes) livers, expressed as median and interquartile range. (\*  $p < 0.05$ , transplanted vs. not transplanted group; #  $p < 0.05$ , ###  $p < 0.001$ , compared to 1 h values within groups)

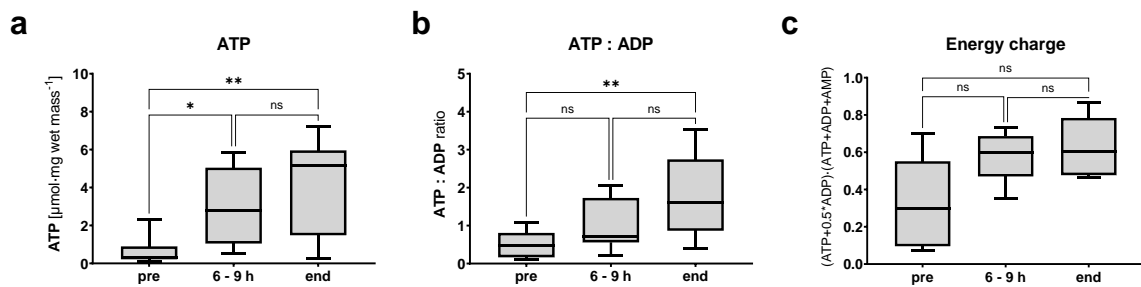

Figure S 5: Analysis of adenine nucleotides in tissue biopsies during normothermic machine perfusion for not transplanted livers. (a) ATP concentration in liver biopsies; (b) Ratio of ATP to ADP; (c) Energy charge calculated as  $(\text{ATP} + 0.5 \cdot \text{ADP}) / (\text{ATP} + \text{ADP} + \text{AMP})$ . Results are shown as median, interquartile range, and min-max values. (\*  $p < 0.05$ , \*\*  $p < 0.01$ , ns = no significance; comparisons between time points)

**Table S 6: ANOVA Table (Type II tests)**

| Parameter | Sum Sq | Df | F     | p-value |
|-----------|--------|----|-------|---------|
| pre_P     | 0.85   | 1  | 3.39  | 0.317   |
| h1_P      | 3.62   | 1  | 14.38 | 0.164   |
| h6_P      | 0.07   | 1  | 0.28  | 0.692   |
| pre_PL    | 0.64   | 1  | 2.56  | 0.356   |
| pre_Jc    | 1.01   | 1  | 4.01  | 0.295   |
| h1_Jc     | 1.77   | 1  | 7.06  | 0.229   |
| h6_Jc     | 0.06   | 1  | 0.24  | 0.709   |
| pre_L     | 0.89   | 1  | 3.53  | 0.311   |
| h1_L      | 0.18   | 1  | 0.70  | 0.557   |
| h6_L      | 0.32   | 1  | 1.26  | 0.463   |
| pre_EP    | 0.19   | 1  | 0.77  | 0.541   |
| h1_EP     | 0.18   | 1  | 0.72  | 0.551   |
| h6_EP     | 0.35   | 1  | 1.40  | 0.447   |
| pre_Pc    | 1.05   | 1  | 4.18  | 0.290   |
| h1_Pc     | 0.81   | 1  | 3.20  | 0.324   |
| h6_Pc     | 0.03   | 1  | 0.11  | 0.795   |
| pre_E     | 1.56   | 1  | 6.20  | 0.243   |
| h1_E      | 1.62   | 1  | 6.44  | 0.239   |
| h6_E      | 0.20   | 1  | 0.81  | 0.533   |
| Residuals | 0.25   | 1  |       |         |

**Table S 7: ANOVA Table (Type II tests) - MEAF**

| Parameter    | b      | conf             | beta  | p-value |
|--------------|--------|------------------|-------|---------|
| (Intercept)  | -4.98  | [ 9.3, -19.3]    |       | 0.470   |
| PL.auc       | 1.38   | [3.77, -1.02]    | 0.54  | 0.241   |
| Jc.auc       | 3.17   | [13.6, -7.31]    | 0.70  | 0.531   |
| L.auc        | 0.0429 | [0.176, -0.0906] | 0.45  | 0.505   |
| Jc.auc:L.auc | -0.001 | [0.235, -0.237]  | -0.01 | 0.993   |

$r^2 = .32$ ,  $ad.r^2 = 0.150$ ,  $F_{(4,16)} = 1.88$ ,  $p = 0.164$

**Table S 8: ANOVA Table (Type II tests) - EAD**

| Parameter    | b       | conf            | beta | p-value |
|--------------|---------|-----------------|------|---------|
| (Intercept)  | 9.85    | [36.9, -13.5]   |      | 0.422   |
| PL.auc       | -2.09   | [1.66, -6.51]   | 0.12 | 0.290   |
| Jc.auc       | 3.1     | [21.5, -12.8]   | >20  | 0.706   |
| L.auc        | -0.0344 | [0.21, -0.263]  | 0.97 | 0.762   |
| Jc.auc:L.auc | -0.0338 | [0.325, -0.423] | 0.97 | 0.851   |

$r^2 = .21$ ,  $ad.r^2 = 0.02$ ,  $F_{(4,16)} = 1.09$ ,  $p = 0.392$
